# Supplementary material for: Research collaboration in health management research communities
Source: Springer Nature journal article supplement (doi:10.1186/1472-6947-13-52), 2013-04-23

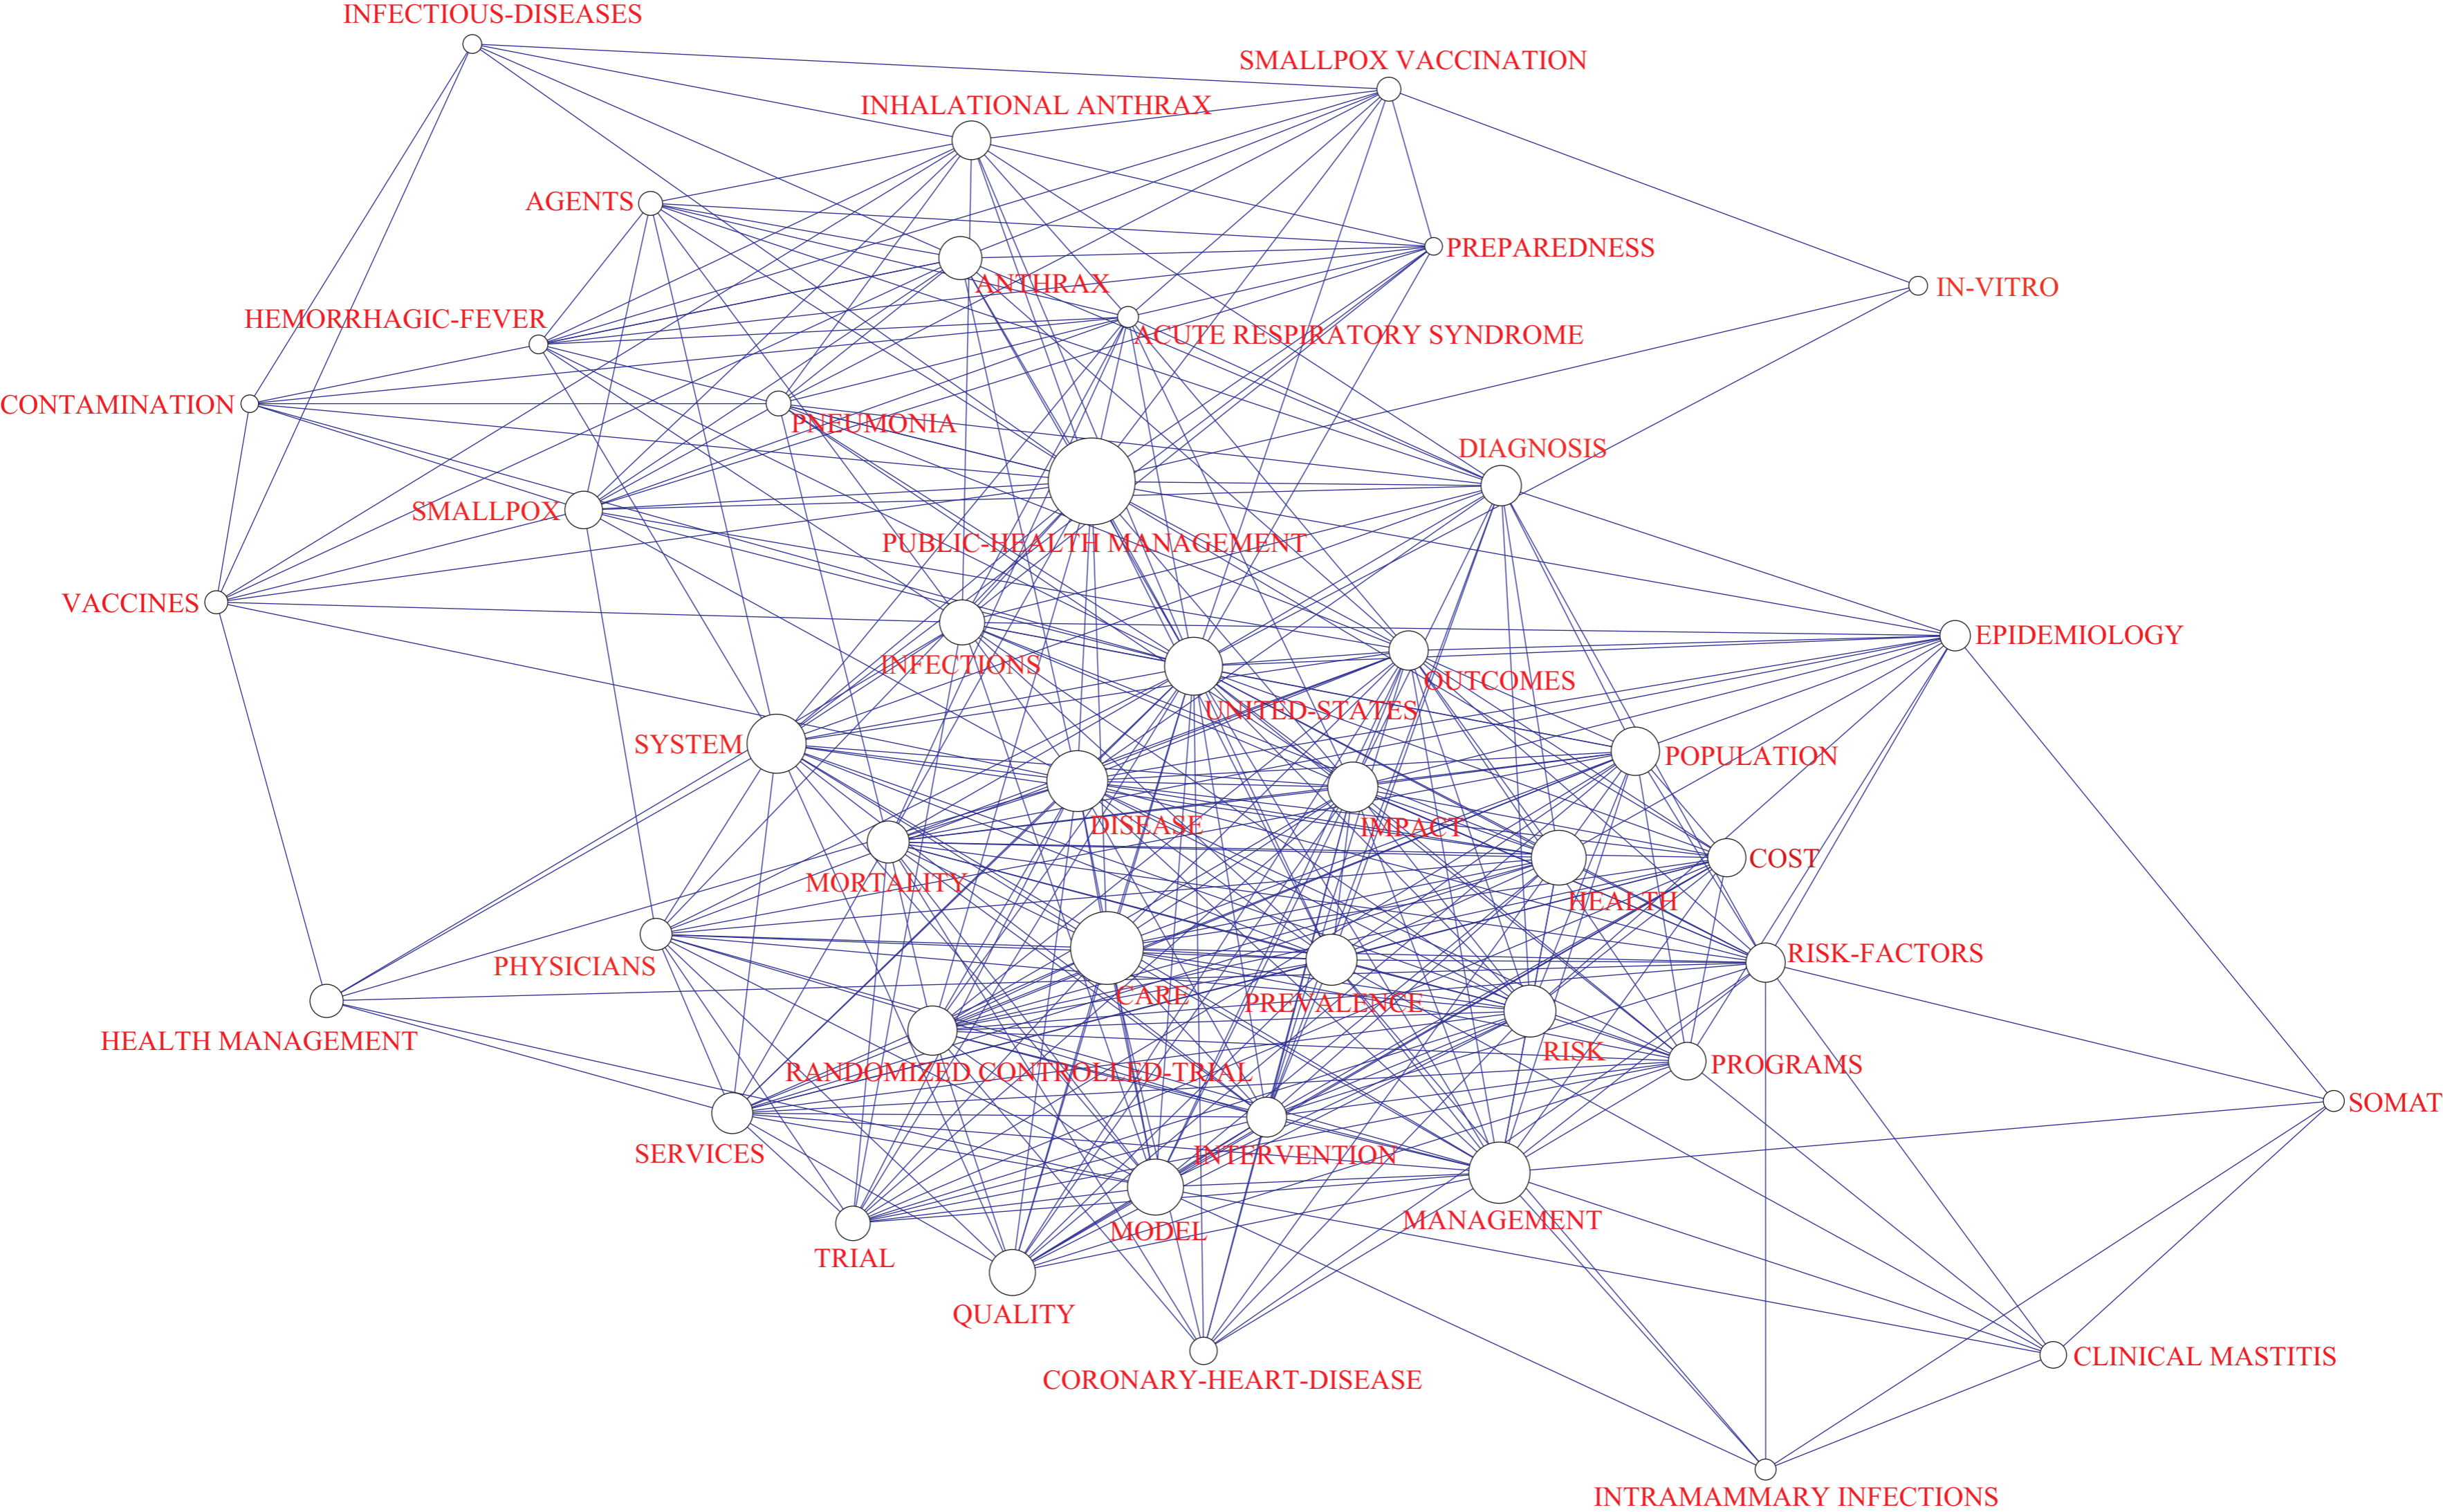

Supplement: 12911_2012_669_MOESM7_ESM.pdf [file 12911_2012_669_MOESM7_ESM.pdf]
